# Supplementary material
Source: PubMed Central journal article supplement (PMC4698800)
Supplement: mmc1.pdf [file mmc1.pdf]

# THE LANCET Psychiatry

## Supplementary appendix

This appendix formed part of the original submission and has been peer reviewed. We post it as supplied by the authors.

Supplement to: Gurillo P, Jauhar S, Murray RM, MacCabe JH. Does tobacco use cause psychosis? Systematic review and meta-analysis. *Lancet Psychiatry* 2015; published online July 10. [http://dx.doi.org/10.1016/S2215-0366\(15\)00152-2](http://dx.doi.org/10.1016/S2215-0366(15)00152-2).

| <b>Study<br/>(author/year)</b> | <b>Type of study</b> | <b>Meta-analysis<br/>selection</b> | <b>Country</b> | <b>Classification<br/>system</b> | <b>Measured<br/>cannabis?</b> |
|--------------------------------|----------------------|------------------------------------|----------------|----------------------------------|-------------------------------|
| Akvardar (2004)                | Cross-sectional      | OP                                 | Turkey         | DSM-IV                           | Yes                           |
| Baeza (2009)                   | Prospective          | Prevalence                         | Spain          | DSM-IV                           | Yes                           |
| Barrigón (2010)                | Cross-sectional      | Prevalence                         | Spain          | DSM-IV                           | Yes                           |
| Beratis (2001)                 | Case-control         | OP, SBOP                           | Greece         | DSM-IV                           | No                            |
| Berk (2010)                    | Prospective          | Prevalence,<br>OP                  | Australia      | DSM-III-R,<br>DSM-IV             | No                            |
| Brewer (2001)                  | Prospective          | Prevalence,<br>SBOP                | Australia      | DSM-III-R                        | Yes                           |
| Cadenhead (2011)               | Prospective          | OR                                 | USA            | DSM-IV                           | Yes                           |
| Compton (2009)                 | Retrospective        | Prevalence                         | USA            | DSM-IV                           | Yes                           |
| Cooper (2012)                  | Cross-sectional      | OP                                 | Australia      | ICD-10                           | No                            |
| Curtis (2011)                  | Retrospective        | Prevalence                         | Australia      | DSM-IV                           | No                            |
| deRuiter (2013)                | Prospective          | Prevalence                         | Canada         | DSM-IV                           | Yes                           |
| Dervaux (2004)                 | Cross-sectional      | OP                                 | France         | DSM-III-R                        | No                            |
| Diaz (2008)                    | Case-control         | SBOP                               | Colombia       | DSM-IV                           | No                            |
| Etter (2004)                   | Case-control         | SBOP                               | Switzerland    | ICD-10,<br>DSM-III-R             | No                            |
| Fawzi (2007)                   | Cross-sectional      | OP                                 | Egypt          | ICD-10                           | No                            |
| Goff (1992)                    | Cross-sectional      | OP                                 | USA            | DSM-III-R                        | Yes                           |
| Hakko (2006)                   | Cross-sectional      | Prevalence                         | Finland        | DSM-IV                           | No                            |
| Harrison (2008)                | Prospective          | Prevalence                         | UK             | DSM-IV                           | Yes                           |
| Hides (2009)                   | Cross-sectional      | Prevalence                         | Australia      | DSM-IV                           | Yes                           |
| Hilti (2010)                   | Case-control         | Prevalence                         | Switzerland    | ICD-10, DSM-IV                   | No                            |
| Ilomäki (2008)                 | Cross-sectional      | Prevalence                         | Finland        | DSM-IV                           | No                            |
| Jiang (2013)                   | Case-control         | SBOP                               | Singapore      | DSM-IV-TR                        | No                            |
| Kelly (1999)                   | Cross-sectional      | OP, SBOP                           | UK             | DSM-III-R,<br>ICD-9              | No                            |
| Kendler (2015)                 | Prospective          | RR                                 | Sweden         | ICD-8 to ICD-10                  | No                            |
| Kobayashi (2010)               | Retrospective        | OP                                 | Japan          | ICD-10                           | No                            |
| Kopala (1992)                  | Case-control         | Prevalence,<br>OR                  | Canada         | DSM-III-R                        | No                            |
| Kotov (2010)                   | Prospective          | Prevalence,<br>OP                  | USA            | DSM-IV                           | No                            |
| Kristensen (2007)              | Prospective          | Prevalence                         | USA            | DSM-IV                           | Yes                           |
| Luty (2002)                    | Prospective          | Prevalence,<br>OR                  | UK             | DSM-IV                           | No                            |
| McCreadie (2000)               | Cross-sectional      | Prevalence                         | UK             | DSM-IV                           | No                            |
| McEvoy (1999)                  | Cross-sectional      | Prevalence                         | USA            | DSM-III-R                        | No                            |
| Mori (2003)                    | Cross-sectional      | OP                                 | Japan          | DSM-IV                           | No                            |
| Patkar (2002)                  | Cross-sectional      | OP                                 | USA            | DSM-IV                           | No                            |
| Pérez-Iglesias (2009)          | Prospective          | Prevalence                         | Spain          | DSM-IV                           | Yes                           |
| Petrovsky (2013)               | Case-control         | OP                                 | Germany        | DSM-IV                           | No                            |
| Reddy (2003)                   | Case-control         | Prevalence,<br>OR                  | USA            | DSM-IV                           | No                            |
| Reddy (2004)                   | Case-control         | Prevalence,<br>OR                  | USA            | DSM-IV                           | No                            |
| Riala (2005)                   | Prospective          | Prevalence,                        | Finland        | DSM-III-R                        | No                            |

|                   |                 | RR, OP, SBOP            |           |               |     |
|-------------------|-----------------|-------------------------|-----------|---------------|-----|
| Roick (2007)      | Case-control    | SBOP                    | Germany   | ICD-10        | No  |
| Salokangas (2000) | Cross-sectional | OP                      | Finland   | DSM-III-R     | No  |
| Sandyk (1991)     | Cross-sectional | OP                      | USA       | DSM-III       | No  |
| Samele (2007)     | Case-control    | Prevalence,<br>OR, SBOP | UK        | ICD-10        | Yes |
| Segarra (2011)    | Prospective     | OP                      | Spain     | DSM-IV        | Yes |
| Sengupta (2008)   | Case-control    | Prevalence,<br>OR       | Canada    | DSM-IV        | No  |
| Smesny (2005)     | Case-control    | Prevalence,<br>OR       | USA       | DSM-IV        | Yes |
| Smesny (2007)     | Case-control    | Prevalence,<br>OR       | Germany   | DSM-IV        | Yes |
| Smith (2009)      | Cross-sectional | Prevalence,<br>OP, SBOP | Canada    | DSM-IV        | No  |
| Smith (2010)      | Prospective     | Prevalence              | Canada    | DSM-IV        | Yes |
| Sørensen (2011)   | Prospective     | RR                      | Denmark   | ICD-8, ICD-10 | No  |
| Strassnig (2007)  | Prospective     | Prevalence,<br>OR       | USA       | DSM-IV        | No  |
| Tidey (2013)      | Case-control    | SBOP, OP                | USA       | DSM-IV        | No  |
| Turan (2009)      | Case-control    | OP                      | Turkey    | DSM-IV        | No  |
| Uzun (2003)       | Prospective     | OP                      | Turkey    | DSM-IV        | No  |
| Wade (2005)       | Cross-sectional | Prevalence,<br>OP       | Australia | DSM-IV        | Yes |
| Wade (2006)       | Prospective     | OP                      | Australia | DSM-IV        | Yes |
| Weiser (2004)     | Prospective     | Prevalence,<br>RR       | Israel    | ICD-9, ICD-10 | No  |
| Yıldız (2010)     | Cross-sectional | OP                      | Turkey    | DSM-IV        | Yes |
| Zabala (2009)     | Cross-sectional | Prevalence              | Spain     | DSM-IV        | No  |
| Zammit (2003)     | Prospective     | Prevalence,<br>RR, OP   | Sweden    | ICD-8, ICD-9  | Yes |
| Zhang (2010)      | Case-control    | SBOP                    | China     | DSM-IV        | No  |
| Zhang (2013)      | Case-control    | Prevalence,<br>OR, SBOP | China     | DSM-IV        | No  |

OP=onset of psychosis. SBOP=smokers who started before onset of psychosis. RR=risk ratio. OR=odds ratio.

**Table 1: Studies in which prevalence was measured by comparison with a control group**

| Country     | Prevalence in first-episode psychosis (author, year)                                                                                                                                      | Prevalence in general population* |
|-------------|-------------------------------------------------------------------------------------------------------------------------------------------------------------------------------------------|-----------------------------------|
| Australia   | 0.66 (Curtis, 2011)<br>0.72 (Berk, 2010)<br>0.66 (Hides, 2009)<br>0.73 (Brewer, 2001)<br>0.77 (Wade, 2005)                                                                                | 0.13                              |
| Canada      | 0.43 (Kopala, 1992)<br>0.60 (Smith, 2010)<br>0.79 (Sengupta, 2008)<br>0.43 (deRuiter, 2013)<br>0.54 (Smith, 2009)                                                                         | 0.12                              |
| China       | 0.36 (Zhang, 2013)                                                                                                                                                                        | 0.21                              |
| Finland     | 0.44 (Hakko, 2006)<br>0.46 (Riala, 2005)<br>0.48 (Ilomäki, 2008)                                                                                                                          | 0.14                              |
| Germany     | 0.47 (Smesny, 2007)                                                                                                                                                                       | 0.19                              |
| Israel      | 0.45 (Weiser, 2004)                                                                                                                                                                       | 0.14                              |
| Spain       | 0.31 (Baeza, 2009)<br>0.59 (Pérez-Iglesias, 2009)<br>0.51 (Zabala, 2009)<br>0.71 (Barrigón, 2010)                                                                                         | 0.21                              |
| Sweden      | 0.61 (Zammit, 2003)                                                                                                                                                                       | 0.13                              |
| Switzerland | 0.83 (Hilti, 2010)                                                                                                                                                                        | 0.17                              |
| UK          | 0.64 (Harrison, 2008)<br>0.73 (McCreadie, 2000)<br>0.49 (Samele, 2007)<br>0.52 (Luty, 2002)                                                                                               | 0.16                              |
| USA         | 0.34 (Strassnig, 2007)<br>0.42 (Reddy, 2003)<br>0.46 (Reddy, 2004)<br>0.63 (Smesny, 2005)<br>0.77 (McEvoy, 1999)<br>0.44 (Compton, 2009)<br>0.66 (Kotov, 2010)<br>0.67 (Kristensen, 2007) | 0.12                              |

FEP=first-episode psychosis. \*Data taken from Ng, 2014.

**Table 2: Prevalence of smoking in individuals with first-episode psychosis and in the general population**

## References (alphabetical order)

- Akvardar Y, Tumuklu M, Akdede BB, Ulas H, Kitis A, Alptekin K. Substance use among patients with schizophrenia in a university hospital. *Bull Clinical Psychopharmacol* 2004; 14: 191–97.
- Baeza I, Graell M, Moreno D, et al. Cannabis use in children and adolescents with first episode psychosis: influence on psychopathology and short-term outcome (CAFEPS study). *Schizophr Res* 2009; 113: 129–37.
- Barrigón ML, Gurpegui M, Ruiz-Veguilla M, et al. Temporal relationship of first-episode non-affective psychosis with cannabis use: a clinical verification of an epidemiological hypothesis. *J Psychiatr Res* 2010; 44: 413–20.
- Beratis S, Katrivanou A, Gourzis P. Factors affecting smoking in schizophrenia. *Compr Psychiatry* 2001; 42: 393–402.
- Berk M, Henry LP, Elkins KS, et al. The impact of smoking on clinical outcomes after first episode psychosis: longer-term outcome findings from the EPPIC 800 follow-up study. *J Dual Diagn* 2010; 6: 212–34.
- Brewer WJ, Pantelis C, Anderson V, et al. Stability of olfactory identification deficits in neuroleptic-naïve patients with first-episode psychosis. *Am J Psychiatry* 2001; 158: 107–15.
- Cadenhead KS. Startle reactivity and prepulse inhibition in prodromal and early psychosis: effects of age, antipsychotics, tobacco and cannabis in a vulnerable population. *Psychiatry Res* 2011; 188: 208–16.
- Compton MT, Kelley ME, Ramsay CE, et al. Association of pre-onset cannabis, alcohol, and tobacco use with age at onset of prodrome and age at onset of psychosis in first-episode patients. *Am J Psychiatry* 2009; 166: 1251–57.
- Cooper J, Mancuso SG, Borland R, Slade T, Galletly C, Castle D. Tobacco smoking among people living with a psychotic illness: the second Australian Survey of Psychosis. *Aust N Z J Psychiatry* 2012; 46: 851–63.
- Curtis J, Henry C, Watkins A, Newall H, Samaras K, Ward PB. Metabolic abnormalities in an early psychosis service: a retrospective, naturalistic cross-sectional study. *Early Interv Psychiatry* 2011; 5: 108–14.
- deRuiter WK, Cheng C, Gehrs M, Langley J, Dewa CS. Substance abuse and smoking among a Canadian cohort of first episode psychosis patients. *Community Ment Health J* 2013; 49: 815–21.
- Dervaux A, Baylé FJ, Laqueille X, et al. Nicotine use in schizophrenia and disinhibition. *Psychiatry Res* 2004; 128: 229–34.
- Diaz FJ, Velásquez DM, Susce MT, de Leon J. The association between schizophrenia and smoking: unexplained by either the illness or the prodromal period. *Schizophr Res* 2008; 104: 214–19.
- Etter M, Mohr S, Garin C, Etter JF. Stages of change in smokers with schizophrenia or schizoaffective disorder and in the general population. *Schizophr Bull* 2004; 30: 459–68.
- Fawzi MH, Fawzi MM, Khedr HH, Fawzi MM. Tobacco smoking in Egyptian schizophrenia patients with and without obsessive-compulsive symptoms. *Schizophr Res* 2007; 95: 236–46.
- Goff DC, Henderson DC, Amico E. Cigarette smoking in schizophrenia: relationship to psychopathology and medication side effects. *Am J Psychiatry* 1992; 149: 1189–94.
- Hakko H, Lintunen J, Lappalainen J, Mäkiyryö T, Räsänen P, Timonen M, and the STUDY-70 Workgroup. Nicotine use and dependence and their association to psychiatric disorders in a large sample of adolescent psychiatric inpatients. *Addict Behav* 2006; 31: 1873–80.
- Harrison I, Joyce EM, Mutsatsa SH, et al. Naturalistic follow-up of co-morbid substance use in schizophrenia: the West London first-episode study. *Psychol Med* 2008; 38: 79–88.
- Hides L, Cotton SM, Berger G, et al. The reliability and validity of the Alcohol, Smoking and Substance Involvement Screening Test (ASSIST) in first-episode psychosis. *Addict Behav* 2009; 34: 821–25.
- Hilti CC, Delko T, Orosz AT, et al. Sustained attention and planning deficits but intact attentional set-shifting in neuroleptic-naïve first-episode schizophrenia patients. *Neuropsychobiology* 2010; 61: 79–86.

- Ilomäki R, Riala K, Hakko H, et al, and the Study 70 Workgroup. Temporal association of onset of daily smoking with adolescent substance use and psychiatric morbidity. *Eur Psychiatry* 2008; 23: 85–91.
- Jiang J, See YM, Subramaniam M, Lee J. Investigation of cigarette smoking among male schizophrenia patients. *PLoS One* 2013; 8: e71343.
- Kelly C, McCreadie RG. Smoking habits, current symptoms, and premorbid characteristics of schizophrenic patients in Nithsdale, Scotland. *Am J Psychiatry* 1999; 156: 1751–57.
- Kendler KS, Lönn SL, Sundquist J, Sundquist K. Smoking and schizophrenia in population cohorts of Swedish women and men: a prospective co-relative control study. *Am J Psychiatry* 2015; published online June 5. <http://dx.doi.org/10.1176/appi.ajp.2015.15010126>.
- Kobayashi M, Ito H, Okumura Y, Mayahara K, Matsumoto Y, Hirakawa J. Hospital readmission in first-time admitted patients with schizophrenia: smoking patients had higher hospital readmission rate than non-smoking patients. *Int J Psychiatry Med* 2010; 40: 247–57.
- Kopala LC, Clark C, Hurwitz T. Olfactory deficits in neuroleptic naive patients with schizophrenia. *Schizophr Res* 1992; 8: 245–50.
- Kotov R, Guey LT, Bromet EJ, Schwartz JE. Smoking in schizophrenia: diagnostic specificity, symptom correlates, and illness severity. *Schizophr Bull* 2010; 36: 173–81.
- Kristensen K, Cadenhead KS. Cannabis abuse and risk for psychosis in a prodromal sample. *Psychiatry Res* 2007; 151: 151–54.
- Luty J, Kelly C, McCreadie RG. Smoking habits, body mass index and risk of heart disease: prospective 2½-year follow-up of first episode schizophrenic patients. *J Subst Use* 2002; 7: 15–18.
- McCreadie RG, Paterson JR, Blacklock C, et al, and the Scottish Schizophrenia Research Group. Smoking habits and plasma lipid peroxide and vitamin E levels in never-treated first-episode patients with schizophrenia. *Br J Psychiatry* 2000; 176: 290–93.
- McEvoy JP, Brown S. Smoking in first-episode patients with schizophrenia. *Am J Psychiatry* 1999; 156: 1120–21.
- Mori T, Sasaki T, Iwanami A, et al. Smoking habits in Japanese patients with schizophrenia. *Psychiatry Res* 2003; 120: 207–09.
- Ng M, Freeman MK, Fleming TD, et al. Smoking prevalence and cigarette consumption in 187 countries, 1980–2012. *JAMA* 2014; 311: 183–92.
- Patkar AA, Gopalakrishnan R, Lundy A, Leone FT, Certa KM, Weinstein SP. Relationship between tobacco smoking and positive and negative symptoms in schizophrenia. *J Nerv Ment Dis* 2002; 190: 604–10.
- Pérez-Iglesias R, Mata I, Pelayo-Teran JM, et al. Glucose and lipid disturbances after 1 year of antipsychotic treatment in a drug-naïve population. *Schizophr Res* 2009; 107: 115–21.
- Petrovsky N, Ettinger U, Quednow BB, et al. Nicotine enhances antisaccade performance in schizophrenia patients and healthy controls. *Int J Neuropsychopharmacol* 2013; 16: 1473–81.
- Reddy R, Keshavan M, Yao JK. Reduced plasma antioxidants in first-episode patients with schizophrenia. *Schizophr Res* 2003; 62: 205–12.
- Reddy RD, Keshavan MS, Yao JK. Reduced red blood cell membrane essential polyunsaturated fatty acids in first episode schizophrenia at neuroleptic-naive baseline. *Schizophr Bull* 2004; 30: 901–11.
- Riala K, Hakko H, Isohanni M, Pouta A, Räsänen P. Is initiation of smoking associated with the prodromal phase of schizophrenia? *J Psychiatry Neurosci* 2005; 30: 26–32.
- Roick C, Fritz-Wieacker A, Matschinger H, et al. Health habits of patients with schizophrenia. *Soc Psychiatry Psychiatr Epidemiol* 2007; 42: 268–76.
- Salokangas RK, Vilkmann H, Ilonen T, et al. High levels of dopamine activity in the basal ganglia of cigarette smokers. *Am J Psychiatry* 2000; 157: 632–34.
- Sandyk R, Kay SR. Tobacco addiction as a marker of age at onset of schizophrenia. *Int J Neurosci* 1991; 57: 259–62.

- Samele C, Patel M, Boydell J, Leese M, Wessely S, Murray R. Physical illness and lifestyle risk factors in people with their first presentation of psychosis. *Soc Psychiatry Psychiatr Epidemiol* 2007; 42: 117–24.
- Segarra R, Zabala A, Eguíluz JI, et al. Cognitive performance and smoking in first-episode psychosis: the self-medication hypothesis. *Eur Arch Psychiatry Clin Neurosci* 2011; 261: 241–50.
- Sengupta S, Parrilla-Escobar MA, Klink R, et al. Are metabolic indices different between drug-naïve first-episode psychosis patients and healthy controls? *Schizophr Res* 2008; 102: 329–36.
- Smesny S, Kinder D, Willhardt I, et al. Increased calcium-independent phospholipase A2 activity in first but not in multiepisode chronic schizophrenia. *Biol Psychiatry* 2005; 57: 399–405.
- Smesny S, Klemm S, Stockebrand M, et al. Endophenotype properties of niacin sensitivity as marker of impaired prostaglandin signalling in schizophrenia. *Prostaglandins Leukot Essent Fatty Acids* 2007; 77: 79–85.
- Smith GN, Wong H, MacEwan GW, et al. Predictors of starting to smoke cigarettes in patients with first episode psychosis. *Schizophr Res* 2009; 108: 258–64.
- Smith GN, Macewan GW, Kopala LC, et al. Prenatal tobacco exposure in first-episode psychosis. *Schizophr Res* 2010; 119: 271–72.
- Sørensen HJ, Mortensen EL, Reinisch JM, Mednick SA. A prospective study of smoking in young women and risk of later psychiatric hospitalization. *Nord J Psychiatry* 2011; 65: 3–8.
- Strassnig M, Miewald J, Keshavan M, Ganguli R. Weight gain in newly diagnosed first-episode psychosis patients and healthy comparisons: one-year analysis. *Schizophr Res* 2007; 93: 90–98.
- Tidey JW, Rohsenow DJ, Kaplan GB, Swift RM, Ahnallen CG. Separate and combined effects of very low nicotine cigarettes and nicotine replacement in smokers with schizophrenia and controls. *Nicotine Tob Res* 2013; 15: 121–29.
- Turan T, Dolu N, Ozsoy S, Esel E. Effects of smoking on P50 waveform in schizophrenic patients. *Bull Clin Psychopharmacol* 2009; 19: 227–35.
- Uzun O, Cansever A, Basoğlu C, Özşahin A. Smoking and substance abuse in outpatients with schizophrenia: a 2-year follow-up study in Turkey. *Drug Alcohol Depend* 2003; 70: 187–92.
- Wade D, Harrigan S, Edwards J, Burgess PM, Whelan G, McGorry PD. Patterns and predictors of substance use disorders and daily tobacco use in first-episode psychosis. *Aust N Z J Psychiatry* 2005; 39: 892–98.
- Wade D, Harrigan S, Edwards J, Burgess PM, Whelan G, McGorry PD. Course of substance misuse and daily tobacco use in first-episode psychosis. *Schizophr Res* 2006; 81: 145–50.
- Weiser M, Reichenberg A, Grotto I, et al. Higher rates of cigarette smoking in male adolescents before the onset of schizophrenia: a historical-prospective cohort study. *Am J Psychiatry* 2004; 161: 1219–23.
- Yıldız M, Yazıcı A, Böke O. Demographic and clinical characteristics in schizophrenia: a multi center cross-sectional case record study. *Turk Psikiyatri Derg* 2010; 21: 213–24 [in Turkish].
- Zabala A, Eguíluz JI, Segarra R, et al. Cognitive performance and cigarette smoking in first-episode psychosis. *Eur Arch Psychiatry Clin Neurosci* 2009; 259: 65–71.
- Zammit S, Allebeck P, Dalman C, Lundberg I, Hemmingsson T, Lewis G. Investigating the association between cigarette smoking and schizophrenia in a cohort study. *Am J Psychiatry* 2003; 160: 2216–21.
- Zhang XY, Li CB, Li M, et al. Smoking initiation and schizophrenia: a replication study in a Chinese Han population. *Schizophr Res* 2010; 119: 110–14.
- Zhang XY, Chen DC, Xiu MH, et al. Cigarette smoking, psychopathology and cognitive function in first-episode drug-naïve patients with schizophrenia: a case-control study. *Psychol Med* 2013; 43: 1651–60.
